# Supplementary material for: SLC22A3 Regulates Ferroptosis in the Mesenchymal Subtype of Triple-Negative Breast Cancer by Modulating Histone H3K4 Serotonylation
Source: Research Square preprint supplement (doi:10.21203/rs.3.rs-7760870/v1), 2025-10-20
Supplement: Supplementary file 2 [file 6e6634f67b6dd77e628045c0.xlsx]

## Sheet: Index
Supplementary Data 1. TNBCsubtype clinical information and signatures
Table	Description
A- TCGA samples information	TCGA barcode identifiers and subtypes in previous studies
B- TCGA samples used in the current study	Consistent TCGA subtype samples identified in the previous stuides
C- GDSC-cell line subtype(TNBC)	cell lines subtype
D- GDSC-Drug sensitivity	PDTX data (drug sensitivity) from Lehman study
E-TKIs sensitivity	Inhibition SLC22A3 by TKIs

## Sheet: A-TCGA samples subtype
Table S6, related to Figure 2. TCGA TNBC patients according to different subtying methods.
Patient.ID	mRNA subtype (extrapolated from this study)	TNBC subtypes defined by Bareche and colleague (Ann Oncol. 2018)	Lehmann subtype (Ann Oncol. 2018)	Clinical subtype	ER.Status.by.IHC	PR.status.by.IHC	IHC.HER2	HER2.fish.status	Race.Category
TCGA-D8-A13Z	LAR	LAR	BL2	Triple Negative	Negative	Negative	Negative	NA	WHITE
TCGA-D8-A143	LAR	LAR	LAR	Triple Negative	Negative	Negative	Negative	NA	WHITE
TCGA-OL-A5D6	LAR	LAR	LAR	Triple Negative	Negative	Negative	NA	Negative	BLACK OR AFRICAN AMERICAN
TCGA-C8-A26Y	LAR	LAR	LAR	Triple Negative	Negative	Negative	Negative	NA	ASIAN
TCGA-C8-A26X	LAR	LAR	LAR	Triple Negative	Negative	Negative	Negative	NA	ASIAN
TCGA-A7-A26F	LAR	UNS	BL2	Triple Negative	Negative	Negative	Equivocal	Negative	WHITE
TCGA-AO-A0J2	LAR	LAR	LAR	Triple Negative	Negative	Negative	Equivocal	Negative	WHITE
TCGA-E2-A159	LAR	UNS	BL2	Triple Negative	Negative	Negative	NA	Negative	WHITE
TCGA-GM-A2DB	LAR	LAR	LAR	Triple Negative	Negative	Negative	Negative	Negative	WHITE
TCGA-GM-A2DD	LAR	LAR	LAR	Triple Negative	Negative	Negative	Equivocal	Negative	WHITE
TCGA-GM-A2DH	LAR	NA	NA	Triple Negative	Negative	Negative	Negative	Negative	WHITE
TCGA-C8-A131	LAR	LAR	UNS	Triple Negative	Negative	Negative	Negative	NA	ASIAN
TCGA-A8-A09X	LAR	LAR	LAR	Triple Negative	Negative	Negative	Negative	Negative	NA
TCGA-LL-A740	LAR	LAR	LAR	Triple Negative	Negative	Negative	Equivocal	Negative	BLACK OR AFRICAN AMERICAN
TCGA-D8-A1JG	LAR	NA	NA	Triple Negative	Negative	Negative	Equivocal	Negative	WHITE
TCGA-D8-A1JF	LAR	LAR	LAR	Triple Negative	Negative	Negative	Negative	NA	WHITE
TCGA-OL-A66P	LAR	LAR	LAR	Triple Negative	Negative	Negative	NA	Negative	BLACK OR AFRICAN AMERICAN
TCGA-LL-A5YO	LAR	IM	IM	Triple Negative	Negative	Negative	Negative	NA	BLACK OR AFRICAN AMERICAN
TCGA-E2-A1LL	LAR	M	BL2	Triple Negative	Negative	Negative	Negative	NA	BLACK OR AFRICAN AMERICAN
TCGA-BH-A0E0	LAR	LAR	LAR	Triple Negative	Negative	Negative	Negative	NA	WHITE
TCGA-OL-A5D7	IM	UNS	UNS	Triple Negative	Negative	Negative	NA	Negative	BLACK OR AFRICAN AMERICAN
TCGA-C8-A27B	IM	BL1	BL1	Triple Negative	Negative	Negative	Negative	NA	ASIAN
TCGA-AR-A5QQ	IM	IM	BL2	Triple Negative	Negative	Negative	Negative	NA	WHITE
TCGA-EW-A6SB	IM	IM	IM	Triple Negative	Negative	Negative	Negative	NA	BLACK OR AFRICAN AMERICAN
TCGA-E2-A1B6	IM	IM	IM	Triple Negative	Negative	Negative	Equivocal	Negative	WHITE
TCGA-E2-A1AZ	IM	UNS	UNS	Triple Negative	Negative	Negative	Indeterminate	Negative	WHITE
TCGA-AR-A0U4	IM	IM	IM	Triple Negative	Negative	Negative	Negative	NA	WHITE
TCGA-AO-A129	IM	BL1	BL1	Triple Negative	Negative	Negative	Negative	Negative	WHITE
TCGA-AO-A128	IM	IM	IM	Triple Negative	Negative	Negative	Negative	Negative	WHITE
TCGA-A2-A0ST	IM	NA	NA	Triple Negative	Negative	Negative	NA	Negative	WHITE
TCGA-A2-A0SX	IM	UNS	UNS	Triple Negative	Negative	Negative	Negative	NA	WHITE
TCGA-S3-AA10	IM	IM	IM	Triple Negative	Negative	Negative	Negative	NA	BLACK OR AFRICAN AMERICAN
TCGA-AR-A1AQ	IM	IM	IM	Triple Negative	Negative	Negative	Equivocal	Negative	WHITE
TCGA-AR-A1AI	IM	IM	IM	Triple Negative	Negative	Negative	Equivocal	Negative	WHITE
TCGA-BH-A1F6	IM	BL1	BL1	Triple Negative	Negative	Negative	Negative	NA	WHITE
TCGA-BH-A1FC	IM	UNS	UNS	Triple Negative	Negative	Negative	Negative	NA	BLACK OR AFRICAN AMERICAN
TCGA-EW-A3U0	IM	IM	IM	Triple Negative	Negative	Negative	Negative	NA	BLACK OR AFRICAN AMERICAN
TCGA-GM-A2DF	IM	BL1	BL1	Triple Negative	Negative	Negative	Negative	Negative	BLACK OR AFRICAN AMERICAN
TCGA-A7-A6VY	IM	UNS	BL2	Triple Negative	Negative	Negative	Negative	NA	BLACK OR AFRICAN AMERICAN
TCGA-D8-A1XQ	IM	BL1	BL1	Triple Negative	Negative	Negative	Negative	NA	WHITE
TCGA-A2-A0CM	IM	IM	IM	Triple Negative	Negative	Negative	Negative	NA	BLACK OR AFRICAN AMERICAN
TCGA-EW-A1P4	IM	IM	BL2	Triple Negative	Negative	Negative	Negative	NA	WHITE
TCGA-D8-A27M	IM	IM	IM	Triple Negative	Negative	Negative	Negative	NA	WHITE
TCGA-EW-A1PB	IM	IM	IM	Triple Negative	Negative	Negative	Negative	NA	BLACK OR AFRICAN AMERICAN
TCGA-A7-A4SD	IM	IM	BL2	Triple Negative	Negative	Negative	Equivocal	Negative	BLACK OR AFRICAN AMERICAN
TCGA-C8-A12V	IM	IM	IM	Triple Negative	Negative	Negative	Negative	NA	ASIAN
TCGA-B6-A3ZX	IM	IM	IM	Triple Negative	Negative	Negative	Negative	NA	BLACK OR AFRICAN AMERICAN
TCGA-E2-A573	IM	IM	IM	Triple Negative	Negative	Negative	Equivocal	Negative	BLACK OR AFRICAN AMERICAN
TCGA-A8-A08R	IM	BL1	BL1	Triple Negative	Negative	Negative	Negative	Negative	NA
TCGA-E2-A1LH	IM	BL1	BL1	Triple Negative	Negative	Negative	Negative	NA	WHITE
TCGA-D8-A1JL	IM	IM	IM	Triple Negative	Negative	Negative	Negative	NA	WHITE
TCGA-A2-A04Q	IM	IM	IM	Triple Negative	Negative	Negative	Equivocal	Negative	WHITE
TCGA-GM-A3XL	IM	IM	IM	Triple Negative	Negative	Negative	NA	Negative	BLACK OR AFRICAN AMERICAN
TCGA-OL-A66I	IM	IM	IM	Triple Negative	Negative	Negative	NA	Negative	BLACK OR AFRICAN AMERICAN
TCGA-BH-A0BW	IM	IM	IM	Triple Negative	Negative	Negative	NA	Negative	BLACK OR AFRICAN AMERICAN
TCGA-A2-A3XT	IM	NA	NA	Triple Negative	Negative	Negative	Negative	Negative	BLACK OR AFRICAN AMERICAN
TCGA-BH-A0B9	IM	IM	IM	Triple Negative	Negative	Negative	Negative	NA	WHITE
TCGA-AC-A6IW	IM	IM	IM	Triple Negative	Negative	Negative	Negative	NA	BLACK OR AFRICAN AMERICAN
TCGA-BH-A0B3	IM	NA	NA	Triple Negative	Negative	Negative	Negative	NA	WHITE
TCGA-BH-A0BG	IM	BL1	BL1	Triple Negative	Negative	Negative	Negative	NA	WHITE
TCGA-AR-A1AR	IM	IM	IM	Triple Negative	Negative	Negative	Negative	NA	WHITE
TCGA-AC-A2QJ	IM	MSL	BL2	Triple Negative	Negative	Negative	Negative	NA	WHITE
TCGA-AC-A7VC	IM	UNS	UNS	Triple Negative	Negative	Negative	Negative	NA	WHITE
TCGA-AO-A0J4	BLIS	BL1	BL1	Triple Negative	Negative	Negative	Negative	NA	BLACK OR AFRICAN AMERICAN
TCGA-BH-A18V	BLIS	BL1	BL1	Triple Negative	Negative	Negative	Negative	NA	WHITE
TCGA-A7-A0DA	BLIS	M	M	Triple Negative	Negative	Negative	Negative	NA	WHITE
TCGA-A7-A0CE	BLIS	NA	NA	Triple Negative	Negative	Negative	Equivocal	Negative	WHITE
TCGA-D8-A147	BLIS	BL1	BL1	Triple Negative	Negative	Negative	Negative	NA	WHITE
TCGA-A7-A26I	BLIS	M	BL2	Triple Negative	Negative	Negative	Equivocal	Negative	WHITE
TCGA-AN-A0XU	BLIS	UNS	UNS	Triple Negative	Negative	Negative	Negative	NA	WHITE
TCGA-A7-A5ZV	BLIS	M	M	Triple Negative	Negative	Negative	Equivocal	Negative	BLACK OR AFRICAN AMERICAN
TCGA-AO-A0J6	BLIS	IM	IM	Triple Negative	Negative	Negative	Negative	NA	WHITE
TCGA-BH-A0WA	BLIS	M	M	Triple Negative	Negative	Negative	Negative	NA	WHITE
TCGA-AR-A0TU	BLIS	BL1	BL1	Triple Negative	Negative	Negative	Negative	NA	NA
TCGA-OL-A6VO	BLIS	BL1	BL1	Triple Negative	Negative	Negative	Negative	Negative	BLACK OR AFRICAN AMERICAN
TCGA-AO-A12F	BLIS	M	M	Triple Negative	Negative	Negative	Negative	NA	WHITE
TCGA-AO-A124	BLIS	BL1	BL1	Triple Negative	Negative	Negative	Negative	NA	WHITE
TCGA-GI-A2C9	BLIS	M	M	Triple Negative	Negative	Negative	Negative	NA	BLACK OR AFRICAN AMERICAN
TCGA-A2-A0T0	BLIS	M	M	Triple Negative	Negative	Negative	Negative	NA	WHITE
TCGA-A2-A0T2	BLIS	M	M	Triple Negative	Negative	Negative	Negative	NA	WHITE
TCGA-BH-A18G	BLIS	M	M	Triple Negative	Negative	Negative	Negative	NA	WHITE
TCGA-AR-A1AY	BLIS	M	M	Triple Negative	Negative	Negative	Negative	NA	WHITE
TCGA-E2-A14R	BLIS	BL1	BL1	Triple Negative	Negative	Negative	Negative	NA	WHITE
TCGA-E2-A158	BLIS	UNS	UNS	Triple Negative	Negative	Negative	Negative	NA	WHITE
TCGA-E2-A14N	BLIS	BL1	BL1	Triple Negative	Negative	Negative	Negative	NA	WHITE
TCGA-E2-A150	BLIS	UNS	UNS	Triple Negative	Negative	Negative	Negative	NA	WHITE
TCGA-C8-A1HJ	BLIS	M	M	Triple Negative	Negative	Negative	Negative	NA	ASIAN
TCGA-A2-A0YE	BLIS	M	M	Triple Negative	Negative	Negative	Negative	NA	WHITE
TCGA-A2-A0YM	BLIS	BL1	BL1	Triple Negative	Negative	Negative	NA	Negative	WHITE
TCGA-AN-A0G0	BLIS	M	M	Triple Negative	Negative	Negative	Negative	NA	WHITE
TCGA-AN-A0AT	BLIS	BL1	BL1	Triple Negative	Negative	Negative	Negative	NA	WHITE
TCGA-AN-A0AR	BLIS	M	M	Triple Negative	Negative	Negative	Negative	NA	WHITE
TCGA-A8-A07O	BLIS	BL1	BL1	Triple Negative	Negative	Negative	Negative	Negative	NA
TCGA-A8-A07C	BLIS	BL1	BL1	Triple Negative	Negative	Negative	Negative	Negative	NA
TCGA-A7-A6VW	BLIS	UNS	BL2	Triple Negative	Negative	Negative	Negative	NA	BLACK OR AFRICAN AMERICAN
TCGA-A7-A6VV	BLIS	M	M	Triple Negative	Negative	Negative	Negative	NA	BLACK OR AFRICAN AMERICAN
TCGA-D8-A1XK	BLIS	UNS	UNS	Triple Negative	Negative	Negative	Negative	NA	WHITE
TCGA-HN-A2NL	BLIS	BL1	BL1	Triple Negative	Negative	Negative	Negative	NA	NA
TCGA-D8-A27F	BLIS	M	M	Triple Negative	Negative	Negative	Negative	NA	WHITE
TCGA-A2-A0D2	BLIS	UNS	UNS	Triple Negative	Negative	Negative	Negative	Negative	WHITE
TCGA-EW-A1OW	BLIS	M	M	Triple Negative	Negative	Negative	Negative	NA	BLACK OR AFRICAN AMERICAN
TCGA-EW-A1P8	BLIS	IM	IM	Triple Negative	Negative	Negative	Negative	NA	WHITE
TCGA-D8-A27H	BLIS	M	M	Triple Negative	Negative	Negative	Negative	NA	WHITE
TCGA-A2-A0D0	BLIS	BL1	BL1	Triple Negative	Negative	Negative	Negative	Negative	BLACK OR AFRICAN AMERICAN
TCGA-AO-A1KR	BLIS	UNS	UNS	Triple Negative	Negative	Negative	Negative	Negative	WHITE
TCGA-EW-A1PH	BLIS	BL1	BL1	Triple Negative	Negative	Negative	Negative	NA	WHITE
TCGA-AR-A256	BLIS	UNS	UNS	Triple Negative	Negative	Negative	Negative	NA	WHITE
TCGA-A7-A4SE	BLIS	M	M	Triple Negative	Negative	Negative	Negative	NA	BLACK OR AFRICAN AMERICAN
TCGA-C8-A134	BLIS	BL1	BL1	Triple Negative	Negative	Negative	Equivocal	NA	ASIAN
TCGA-E2-A574	BLIS	M	M	Triple Negative	Negative	Negative	Equivocal	Negative	BLACK OR AFRICAN AMERICAN
TCGA-AN-A04D	BLIS	M	M	Triple Negative	Negative	Negative	Negative	NA	WHITE
TCGA-E2-A1LS	BLIS	M	M	Triple Negative	Negative	Negative	Negative	NA	WHITE
TCGA-E2-A1LG	BLIS	UNS	UNS	Triple Negative	Negative	Negative	Equivocal	Negative	BLACK OR AFRICAN AMERICAN
TCGA-E2-A1LK	BLIS	BL1	BL1	Triple Negative	Negative	Negative	Equivocal	Negative	BLACK OR AFRICAN AMERICAN
TCGA-E2-A1LI	BLIS	BL1	BL1	Triple Negative	Negative	Negative	Equivocal	Negative	WHITE
TCGA-B6-A409	BLIS	BL1	BL1	Triple Negative	Negative	Negative	Equivocal	Negative	BLACK OR AFRICAN AMERICAN
TCGA-A1-A0SP	BLIS	M	M	Triple Negative	Negative	Negative	Negative	NA	NA
TCGA-A1-A0SO	BLIS	M	M	Triple Negative	Negative	Negative	Equivocal	Negative	WHITE
TCGA-A1-A0SK	BLIS	M	M	Triple Negative	Negative	Negative	Negative	NA	ASIAN
TCGA-B6-A402	BLIS	BL1	BL1	Triple Negative	Negative	Negative	Negative	NA	BLACK OR AFRICAN AMERICAN
TCGA-B6-A400	BLIS	M	M	Triple Negative	Negative	Negative	Negative	NA	BLACK OR AFRICAN AMERICAN
TCGA-A2-A04T	BLIS	BL1	BL1	Triple Negative	Negative	Negative	Equivocal	Negative	WHITE
TCGA-AC-A2BK	BLIS	M	M	Triple Negative	Negative	Negative	Negative	NA	BLACK OR AFRICAN AMERICAN
TCGA-OL-A5RW	BLIS	BL1	BL1	Triple Negative	Negative	Negative	NA	Negative	BLACK OR AFRICAN AMERICAN
TCGA-AQ-A54N	BLIS	BL1	BL1	Triple Negative	Negative	Negative	Equivocal	Negative	BLACK OR AFRICAN AMERICAN
TCGA-A2-A3XU	BLIS	M	M	Triple Negative	Negative	Negative	NA	Negative	BLACK OR AFRICAN AMERICAN
TCGA-A2-A3XS	BLIS	BL1	BL1	Triple Negative	Negative	Negative	NA	Negative	BLACK OR AFRICAN AMERICAN
TCGA-A2-A3XX	BLIS	BL1	BL1	Triple Negative	Negative	Negative	Negative	Negative	BLACK OR AFRICAN AMERICAN
TCGA-BH-A0AV	BLIS	M	M	Triple Negative	Negative	Negative	NA	Negative	BLACK OR AFRICAN AMERICAN
TCGA-AC-A2QH	BLIS	M	M	Triple Negative	Negative	Negative	Negative	NA	WHITE
TCGA-E2-A1L7	MES	NA	NA	Triple Negative	Negative	Negative	Negative	NA	WHITE
TCGA-BH-A0RX	MES	NA	NA	Triple Negative	Negative	Negative	Negative	NA	WHITE
TCGA-AR-A0TS	MES	BL1	BL1	Triple Negative	Negative	Negative	Negative	NA	WHITE
TCGA-LL-A441	MES	MSL	MSL	Triple Negative	Negative	Negative	Negative	NA	BLACK OR AFRICAN AMERICAN
TCGA-AQ-A04J	MES	MSL	MSL	Triple Negative	Negative	Negative	Negative	NA	WHITE
TCGA-E2-A14X	MES	BL1	BL1	Triple Negative	Negative	Negative	Negative	NA	BLACK OR AFRICAN AMERICAN
TCGA-AN-A0AL	MES	MSL	MSL	Triple Negative	Negative	Negative	Negative	NA	WHITE
TCGA-A2-A04P	MES	NA	NA	Triple Negative	Negative	Negative	NA	Negative	BLACK OR AFRICAN AMERICAN
TCGA-BH-A0E6	MES	M	M	Triple Negative	Negative	Negative	Equivocal	Negative	WHITE
TCGA-OL-A97C	MES	NA	NA	Triple Negative	Negative	Negative	NA	Negative	BLACK OR AFRICAN AMERICAN
TCGA-D8-A142	MES	M	M	Triple Negative	Negative	Negative	Equivocal	Negative	WHITE
TCGA-A2-A1G6	MES	NA	NA	Triple Negative	Negative	Negative	Negative	NA	WHITE
TCGA-A7-A26G	MES	MSL	MSL	Triple Negative	Negative	Negative	Negative	NA	BLACK OR AFRICAN AMERICAN
TCGA-S3-AA15	MES	MSL	MSL	Triple Negative	Negative	Negative	Negative	NA	BLACK OR AFRICAN AMERICAN
TCGA-BH-A1EW	MES	NA	NA	Triple Negative	Negative	Negative	Negative	NA	WHITE
TCGA-C8-A3M7	MES	NA	NA	Triple Negative	Negative	Negative	Negative	NA	ASIAN
TCGA-LL-A73Y	MES	UNS	UNS	Triple Negative	Negative	Negative	Negative	NA	BLACK OR AFRICAN AMERICAN
TCGA-E9-A5FL	MES	MSL	BL2	Triple Negative	Negative	Negative	Negative	NA	WHITE
TCGA-GM-A2DI	MES	NA	NA	Triple Negative	Negative	Negative	NA	Negative	WHITE
TCGA-EW-A1OV	MES	IM	IM	Triple Negative	Negative	Negative	Negative	Negative	WHITE
TCGA-EW-A1P7	MES	NA	NA	Triple Negative	Negative	Negative	Equivocal	Negative	WHITE
TCGA-EW-A1P1	MES	NA	NA	Triple Negative	Negative	Negative	Equivocal	Negative	WHITE
TCGA-AR-A2LH	MES	NA	NA	Triple Negative	Negative	Negative	Equivocal	Negative	WHITE
TCGA-AR-A2LR	MES	M	M	Triple Negative	Negative	Negative	Negative	NA	WHITE
TCGA-AO-A03U	MES	UNS	UNS	Triple Negative	Negative	Negative	Negative	Negative	WHITE
TCGA-BH-A42U	MES	NA	NA	Triple Negative	Negative	Negative	Negative	NA	BLACK OR AFRICAN AMERICAN
TCGA-A2-A3XY	MES	MSL	MSL	Triple Negative	Negative	Negative	Negative	Negative	BLACK OR AFRICAN AMERICAN
TCGA-BH-A0BL	MES	MSL	MSL	Triple Negative	Negative	Negative	Negative	NA	WHITE

## Sheet: BTCGA sample used in this study
Table S6, related to Figure 2. TCGA TNBC patients according to different subtying methods.
Patient.ID	mRNA subtype (extrapolated from this study)	TNBC subtypes defined by Bareche and colleague (Ann Oncol. 2018)	Lehmann subtype (Ann Oncol. 2018)	Clinical subtype	ER.Status.by.IHC	PR.status.by.IHC	IHC.HER2	HER2.fish.status	Race.Category
TCGA-D8-A143	LAR	LAR	LAR	Triple Negative	Negative	Negative	Negative	NA	WHITE
TCGA-OL-A5D6	LAR	LAR	LAR	Triple Negative	Negative	Negative	NA	Negative	BLACK OR AFRICAN AMERICAN
TCGA-C8-A26Y	LAR	LAR	LAR	Triple Negative	Negative	Negative	Negative	NA	ASIAN
TCGA-C8-A26X	LAR	LAR	LAR	Triple Negative	Negative	Negative	Negative	NA	ASIAN
TCGA-AO-A0J2	LAR	LAR	LAR	Triple Negative	Negative	Negative	Equivocal	Negative	WHITE
TCGA-GM-A2DB	LAR	LAR	LAR	Triple Negative	Negative	Negative	Negative	Negative	WHITE
TCGA-GM-A2DD	LAR	LAR	LAR	Triple Negative	Negative	Negative	Equivocal	Negative	WHITE
TCGA-A8-A09X	LAR	LAR	LAR	Triple Negative	Negative	Negative	Negative	Negative	NA
TCGA-LL-A740	LAR	LAR	LAR	Triple Negative	Negative	Negative	Equivocal	Negative	BLACK OR AFRICAN AMERICAN
TCGA-D8-A1JF	LAR	LAR	LAR	Triple Negative	Negative	Negative	Negative	NA	WHITE
TCGA-OL-A66P	LAR	LAR	LAR	Triple Negative	Negative	Negative	NA	Negative	BLACK OR AFRICAN AMERICAN
TCGA-BH-A0E0	LAR	LAR	LAR	Triple Negative	Negative	Negative	Negative	NA	WHITE
TCGA-AO-A0J4	BLIS	BL1	BL1	Triple Negative	Negative	Negative	Negative	NA	BLACK OR AFRICAN AMERICAN
TCGA-BH-A18V	BLIS	BL1	BL1	Triple Negative	Negative	Negative	Negative	NA	WHITE
TCGA-D8-A147	BLIS	BL1	BL1	Triple Negative	Negative	Negative	Negative	NA	WHITE
TCGA-AR-A0TU	BLIS	BL1	BL1	Triple Negative	Negative	Negative	Negative	NA	NA
TCGA-OL-A6VO	BLIS	BL1	BL1	Triple Negative	Negative	Negative	Negative	Negative	BLACK OR AFRICAN AMERICAN
TCGA-AO-A124	BLIS	BL1	BL1	Triple Negative	Negative	Negative	Negative	NA	WHITE
TCGA-E2-A14R	BLIS	BL1	BL1	Triple Negative	Negative	Negative	Negative	NA	WHITE
TCGA-E2-A14N	BLIS	BL1	BL1	Triple Negative	Negative	Negative	Negative	NA	WHITE
TCGA-A2-A0YM	BLIS	BL1	BL1	Triple Negative	Negative	Negative	NA	Negative	WHITE
TCGA-AN-A0AT	BLIS	BL1	BL1	Triple Negative	Negative	Negative	Negative	NA	WHITE
TCGA-A8-A07O	BLIS	BL1	BL1	Triple Negative	Negative	Negative	Negative	Negative	NA
TCGA-A8-A07C	BLIS	BL1	BL1	Triple Negative	Negative	Negative	Negative	Negative	NA
TCGA-HN-A2NL	BLIS	BL1	BL1	Triple Negative	Negative	Negative	Negative	NA	NA
TCGA-A2-A0D0	BLIS	BL1	BL1	Triple Negative	Negative	Negative	Negative	Negative	BLACK OR AFRICAN AMERICAN
TCGA-EW-A1PH	BLIS	BL1	BL1	Triple Negative	Negative	Negative	Negative	NA	WHITE
TCGA-C8-A134	BLIS	BL1	BL1	Triple Negative	Negative	Negative	Equivocal	NA	ASIAN
TCGA-E2-A1LK	BLIS	BL1	BL1	Triple Negative	Negative	Negative	Equivocal	Negative	BLACK OR AFRICAN AMERICAN
TCGA-E2-A1LI	BLIS	BL1	BL1	Triple Negative	Negative	Negative	Equivocal	Negative	WHITE
TCGA-B6-A409	BLIS	BL1	BL1	Triple Negative	Negative	Negative	Equivocal	Negative	BLACK OR AFRICAN AMERICAN
TCGA-B6-A402	BLIS	BL1	BL1	Triple Negative	Negative	Negative	Negative	NA	BLACK OR AFRICAN AMERICAN
TCGA-A2-A04T	BLIS	BL1	BL1	Triple Negative	Negative	Negative	Equivocal	Negative	WHITE
TCGA-OL-A5RW	BLIS	BL1	BL1	Triple Negative	Negative	Negative	NA	Negative	BLACK OR AFRICAN AMERICAN
TCGA-AQ-A54N	BLIS	BL1	BL1	Triple Negative	Negative	Negative	Equivocal	Negative	BLACK OR AFRICAN AMERICAN
TCGA-A2-A3XS	BLIS	BL1	BL1	Triple Negative	Negative	Negative	NA	Negative	BLACK OR AFRICAN AMERICAN
TCGA-A2-A3XX	BLIS	BL1	BL1	Triple Negative	Negative	Negative	Negative	Negative	BLACK OR AFRICAN AMERICAN
TCGA-LL-A441	MES	MSL	MSL	Triple Negative	Negative	Negative	Negative	NA	BLACK OR AFRICAN AMERICAN
TCGA-AQ-A04J	MES	MSL	MSL	Triple Negative	Negative	Negative	Negative	NA	WHITE
TCGA-AN-A0AL	MES	MSL	MSL	Triple Negative	Negative	Negative	Negative	NA	WHITE
TCGA-BH-A0E6	MES	M	M	Triple Negative	Negative	Negative	Equivocal	Negative	WHITE
TCGA-D8-A142	MES	M	M	Triple Negative	Negative	Negative	Equivocal	Negative	WHITE
TCGA-A7-A26G	MES	MSL	MSL	Triple Negative	Negative	Negative	Negative	NA	BLACK OR AFRICAN AMERICAN
TCGA-S3-AA15	MES	MSL	MSL	Triple Negative	Negative	Negative	Negative	NA	BLACK OR AFRICAN AMERICAN
TCGA-AR-A2LR	MES	M	M	Triple Negative	Negative	Negative	Negative	NA	WHITE
TCGA-A2-A3XY	MES	MSL	MSL	Triple Negative	Negative	Negative	Negative	Negative	BLACK OR AFRICAN AMERICAN
TCGA-BH-A0BL	MES	MSL	MSL	Triple Negative	Negative	Negative	Negative	NA	WHITE
TCGA-EW-A6SB	IM	IM	IM	Triple Negative	Negative	Negative	Negative	NA	BLACK OR AFRICAN AMERICAN
TCGA-E2-A1B6	IM	IM	IM	Triple Negative	Negative	Negative	Equivocal	Negative	WHITE
TCGA-AR-A0U4	IM	IM	IM	Triple Negative	Negative	Negative	Negative	NA	WHITE
TCGA-AO-A128	IM	IM	IM	Triple Negative	Negative	Negative	Negative	Negative	WHITE
TCGA-S3-AA10	IM	IM	IM	Triple Negative	Negative	Negative	Negative	NA	BLACK OR AFRICAN AMERICAN
TCGA-AR-A1AQ	IM	IM	IM	Triple Negative	Negative	Negative	Equivocal	Negative	WHITE
TCGA-AR-A1AI	IM	IM	IM	Triple Negative	Negative	Negative	Equivocal	Negative	WHITE
TCGA-EW-A3U0	IM	IM	IM	Triple Negative	Negative	Negative	Negative	NA	BLACK OR AFRICAN AMERICAN
TCGA-A2-A0CM	IM	IM	IM	Triple Negative	Negative	Negative	Negative	NA	BLACK OR AFRICAN AMERICAN
TCGA-D8-A27M	IM	IM	IM	Triple Negative	Negative	Negative	Negative	NA	WHITE
TCGA-EW-A1PB	IM	IM	IM	Triple Negative	Negative	Negative	Negative	NA	BLACK OR AFRICAN AMERICAN
TCGA-C8-A12V	IM	IM	IM	Triple Negative	Negative	Negative	Negative	NA	ASIAN
TCGA-B6-A3ZX	IM	IM	IM	Triple Negative	Negative	Negative	Negative	NA	BLACK OR AFRICAN AMERICAN
TCGA-E2-A573	IM	IM	IM	Triple Negative	Negative	Negative	Equivocal	Negative	BLACK OR AFRICAN AMERICAN
TCGA-D8-A1JL	IM	IM	IM	Triple Negative	Negative	Negative	Negative	NA	WHITE
TCGA-A2-A04Q	IM	IM	IM	Triple Negative	Negative	Negative	Equivocal	Negative	WHITE
TCGA-GM-A3XL	IM	IM	IM	Triple Negative	Negative	Negative	NA	Negative	BLACK OR AFRICAN AMERICAN
TCGA-OL-A66I	IM	IM	IM	Triple Negative	Negative	Negative	NA	Negative	BLACK OR AFRICAN AMERICAN
TCGA-BH-A0BW	IM	IM	IM	Triple Negative	Negative	Negative	NA	Negative	BLACK OR AFRICAN AMERICAN
TCGA-BH-A0B9	IM	IM	IM	Triple Negative	Negative	Negative	Negative	NA	WHITE
TCGA-AC-A6IW	IM	IM	IM	Triple Negative	Negative	Negative	Negative	NA	BLACK OR AFRICAN AMERICAN
TCGA-AR-A1AR	IM	IM	IM	Triple Negative	Negative	Negative	Negative	NA	WHITE

## Sheet: C-GDSC-cell line subtype(TNBC)
	BL1	M	BL2	LAR	MSL	IM	Subtype
HCC2157	0.682521	0.170489	-0.566952	-0.151027	-0.227015	-0.0195066	BL1
COLO-824	0.514188	0.326841	-0.546409	-0.255976	-0.230351	-0.240318	BL1
MDA-MB-157	0.390473	0.31301	-0.349225	-0.298295	-0.0713906	-0.104474	BL1
HCC1599	0.583967	0.275007	-0.399678	-0.343628	-0.272861	-0.176993	BL1
HCC70	0.0747757	-0.294428	0.340479	0.00939837	-0.21249	0.185248	BL2
MDA-MB-468	0.0558741	-0.0731741	0.348902	0.00156906	-0.245494	-0.00754004	BL2
HCC1937	0.0866017	-0.224213	0.254244	-0.00128437	-0.187572	0.0918344	BL2
HCC1806	-0.190144	-0.190044	0.328806	-0.0230801	0.0252784	0.108962	BL2
MDA-MB-231	-0.143031	-0.0376972	0.185221	-0.0364307	0.159148	0.0323444	BL2
Hs-578-T	-0.238321	0.318613	0.237024	-0.0854796	0.283337	-0.244375	BL2
HCC1143	-0.101075	-0.117008	0.396586	-0.0950344	-0.0912742	0.0633958	BL2
HDQ-P1	-0.150945	-0.179643	0.251075	-0.103852	0.0783953	0.181643	BL2
MDA-MB-436	0.0393851	-0.15653	0.119816	-0.137577	0.0533197	0.182554	BL2
CAL-85-1	-0.175108	-0.113027	0.363444	-0.147353	-0.0856625	0.0374057	BL2
MDA-MB-453	-0.181042	-0.172293	-0.211784	0.548078	0.00735315	0.0663293	LAR
MRK-nu-1	0.0945377	-0.166054	-0.236025	0.374396	-0.106232	0.0976622	LAR
BT-20	-0.127603	-0.199535	0.225344	0.330093	-0.0564072	0.0364374	LAR
MFM-223	-0.155474	-0.0353089	-0.039529	0.316941	0.0315863	-0.0659192	LAR
CAL-148	-0.0804855	-0.0652111	-0.425695	0.310597	0.00804064	0.0836814	LAR
CAL-51	-0.116245	0.274133	0.0881265	0.0551719	0.115755	-0.20951	M
CAL-120	-0.156648	0.131321	0.186354	0.0108464	0.121747	-0.122869	M
HCC1395	-0.0849975	0.0955817	0.0694455	-0.170601	0.142198	0.021213	M
HCC38	-0.00180958	0.213951	0.156797	-0.211446	-0.0794375	-0.0719481	M
BT-549	-0.140443	0.0887499	0.208145	-0.223681	0.135707	-0.0818482	M
DU-4475	-0.0889501	-0.0336228	-0.0993755	0.104371	0.0584703	0.0733196	UNC
HCC1187	0.0146518	-0.353252	-0.100096	-0.151632	-0.119117	0.289835	UNC

## Sheet: D-PDTX-Drug sensitivity
DRUG_NAME	BL1_tvalue	BL1_pvalue	BL2_tvalue	BL2_pvalue	M_tvalue	M_pvalue	LAR_tvalue	LAR_pvalue	target	pathway
Axitinib	1.0035	0.333935	-0.32248	0.752217	-3.11732	0.00816974	-0.61436	0.549579	PDGFR, KIT, VEGFR	RTK signaling
RI-1	-0.575344	0.667625	-0.0768686	0.95116	60.6817	0.0104902	0.285086	0.823199	RAD51	Unknown
Nilotinib	-0.528744	0.605893	0.135292	0.894453	2.86438	0.0132854	0.215672	0.83259	ABL	ABL signaling
ABT-263	-0.025257	0.980234	-0.144043	0.887675	2.45967	0.028687	0.464768	0.649786	BCL2, BCL-XL, BCL-W	apoptosis regulation
Cisplatin	0.0600776	0.953008	-0.00799183	0.993745	2.10778	0.0550299	1.7886	0.0969951	DNA crosslinker	DNA replication
Docetaxel	-0.110421	0.9139	0.998521	0.337736	2.07906	0.0597224	-0.829777	0.422865	Microtubules	cytoskeleton
SB-505124	-1.03767	0.318341	1.57472	0.139334	-1.78777	0.0971344	0.577223	0.57365	TGFbetaR-I (ALK5)	other
BMS-345541	0.0999513	0.922358	-1.13855	0.281433	1.79156	0.103464	-0.8999	0.38933	IKK-beta	other
JQ1	-1.36471	0.1955	1.32667	0.20745	-1.68575	0.115682	0.188783	0.853178	BRD2, BRD3, BRD4	chromatin other
LY317615	0.70513	0.496825	-0.372315	0.717427	1.69222	0.121477	-1.47702	0.170456	PKC beta	other
JNK Inhibitor VIII	-0.0127842	0.989994	0.280947	0.783173	-1.55709	0.143451	1.57374	0.13956	JNK	JNK and p38 signaling
BIRB 0796	0.494653	0.629099	-1.178	0.25991	-1.55272	0.144487	-0.0614547	0.951932	p38, JNK2	JNK and p38 signaling
EHT 1864	0.448646	0.663252	-0.753094	0.468752	-1.5543	0.151164	-0.11077	0.913991	Rac GTPases	cytoskeleton
Bryostatin	2.33565	0.101623	-2.94305	0.0603616	-1.86935	0.158355	-0.22907	0.833543	PKC	Unknown
PD-173074	-1.53509	0.148734	1.41963	0.179248	-1.49613	0.158498	-0.0321873	0.974812	FGFR1, FGFR3	RTK signaling
PF-562271	-0.0730504	0.943207	0.408201	0.691729	1.4655	0.173509	-2.23033	0.049815	FAK	cytoskeleton
AICAR	0.547951	0.603498	-0.938821	0.38406	-1.50682	0.182576	0.393424	0.707606	AMPK agonist	metabolism
CEP-701	-0.809433	0.432832	2.05253	0.0608186	-1.3853	0.18927	-0.496964	0.627513	FLT3, JAK2, NTRK1, RET	RTK signaling
YK 4-279	-1.99407	0.0741164	0.593466	0.56605	1.3413	0.209489	0.19498	0.849313	RNA helicase A	other
RO-3306	0.875299	0.397295	-0.790217	0.443578	-1.25905	0.23015	0.414113	0.685542	CDK1	cell cycle
FK866	-0.504511	0.624832	-0.340546	0.740491	1.25491	0.238045	-0.667994	0.519257	NAMPT inhibitor	metabolism
Nutlin-3a	-1.86011	0.0856402	0.607239	0.554151	-1.19472	0.253537	0.911883	0.37843	MDM2	p53 pathway
OSI-906	0.582155	0.573352	0.157067	0.878318	1.19974	0.257891	-2.91224	0.0155051	IGF1R	IGFR signaling
BMS-708163	0.0135575	0.989389	0.0426103	0.96666	-1.14097	0.274466	-0.0229233	0.98206	gamma-secretase	other
Tamoxifen	0.290771	0.775814	-0.685219	0.505241	-1.11238	0.286122	-1.14293	0.27368	ER	other
AKT inhibitor VIII	-0.136475	0.896771	0.400935	0.705027	1.17781	0.291874	-1.45777	0.2047	AKT1/2/3	PI3K signaling
Epirubicin	0.625972	0.558795	-0.21467	0.838506	-1.14618	0.303596	0.727457	0.499567	DNA damage	Unknown
SL 0101-1	-1.3175	0.210419	1.64738	0.123425	-1.03691	0.318683	0.748	0.467777	RSK, AURKB, PIM3	ERK MAPK signaling
Carboplatin	-0.198266	0.850646	-1.63255	0.163493	1.0754	0.331325	0.29999	0.776256	DNA akylating agent	Unknown
Embelin	-0.907405	0.385537	-0.213016	0.835595	0.942844	0.367981	0.0883206	0.931366	XIAP	apoptosis regulation
EPZ5676	0.0794976	0.949496	-0.805592	0.568282	1.50998	0.372388	-0.335507	0.793923	DOT1L	Unknown
Bosutinib	0.447932	0.661576	0.522133	0.61036	-0.902681	0.383116	-1.12711	0.280072	SRC, ABL, TEC	ABL signaling
PD-0332991	-0.223006	0.826996	-1.27605	0.224266	-0.867695	0.401295	-1.0519	0.312004	CDK4, CDK6	cell cycle
PF-02341066	-0.151777	0.881693	-0.318558	0.755122	-0.824507	0.424522	-0.0330392	0.974145	MET, ALK	Unknown
NVP-BEZ235	1.93438	0.0751313	-0.585401	0.568302	0.821417	0.426217	-4.35996	0.000772657	PI3K (Class 1) and mTORC1/2	PI3K signaling
Bortezomib	-2.39637	0.251674	0.650401	0.632889	1.2626	0.426442	1.34394	0.407247	Proteasome	other
AZD6482	1.05242	0.311775	0.346869	0.734241	-0.792666	0.442199	-1.02512	0.324005	PI3Kb	PI3Kb
17-AAG	-0.235244	0.817685	1.85683	0.0861345	0.787816	0.444932	0.207037	0.839189	HSP90	other
Lapatinib	0.213256	0.86624	-1.04819	0.485026	1.15005	0.455644	-0.488597	0.710667	ERBB2, EGFR	EGFR signaling
GW843682X (AN-13)	0.841143	0.419927	0.195939	0.848582	-0.733715	0.479971	-0.683132	0.51004	PLK1	Unknown
Lenalidomide	0.99066	0.339933	-0.414672	0.685143	-0.666279	0.516883	-0.908508	0.380144	TNF alpha	other
GSK1904529A	-0.495195	0.631162	0.438258	0.670515	0.665174	0.520984	0.0272817	0.978772	IGF-IR and IR	Unknown
Camptothecin	-1.94816	0.0717309	0.928203	0.36903	0.655535	0.52275	3.22111	0.0061565	TOP1	DNA replication
PF-4708671	1.62699	0.127722	-1.76392	0.101217	0.64866	0.527851	-1.08391	0.298099	p70 S6KA	TOR signaling
GSK269962A	-0.0781616	0.93889	-0.265744	0.794604	-0.647874	0.528343	0.184428	0.856523	ROCK1/2	cytoskeleton
Sorafenib	0.00885821	0.993106	-0.202687	0.843444	-0.637048	0.538403	-0.868786	0.405333	PDGFR, KIT, VEGFR	RTK signaling
BMS-754807	-0.301089	0.768109	1.15739	0.267936	0.617526	0.547553	-0.575465	0.574803	IGF-1R/IR	IGFR signaling
INCB-18424	-0.627225	0.544566	-0.258313	0.801404	-0.614482	0.55262	1.07908	0.30589	JAK1, JAK2, TYK2	Unknown
ZM-447439	1.67724	0.117361	-1.95489	0.0724443	-0.604069	0.556193	-1.31709	0.210554	AURKB	mitosis
JNJ-26854165	0.964706	0.357441	-0.937516	0.370583	-0.603264	0.559766	-0.95526	0.361968	MDM2	p53 pathway
Everolimus	2.59584	0.0484927	-0.483892	0.648911	-0.616205	0.564728	-2.12327	0.0871443	mTOR	Unknown
PD-0325901	0.362354	0.722499	0.562971	0.582359	-0.58099	0.570482	-0.759659	0.46006	MEK1, MEK2	ERK MAPK signaling
XAV 939	1.01098	0.335862	-0.802665	0.440828	0.52997	0.607698	-0.706039	0.496283	Tankyrase (PARP5a)	WNT signaling
Fulvestrant	-0.489285	0.635194	0.0251897	0.980399	0.517224	0.616246	0.702844	0.498188	ER	Unknown
PF477736	0.11893	0.907686	-0.868607	0.405426	0.508268	0.622289	2.02497	0.0703933	CHEK1 (CHEK2)	Genome integrity (CHEK)
AZ960	0.373306	0.716713	-0.261243	0.799207	-0.489871	0.634794	-1.73512	0.113374	JAK2	Unknown
PAC-1	0.14498	0.887607	-0.0651472	0.949341	-0.488424	0.635782	-0.675965	0.514391	Caspase 3 activator	apoptosis regulation
TW 37	-1.15528	0.274833	0.110872	0.913912	0.486582	0.637043	1.77944	0.105523	BCL-2, BCL-XL	apoptosis regulation
Bicalutamide	0.909059	0.384705	-1.09715	0.298291	-0.471993	0.647062	-2.27814	0.0459306	Androgen receptor	other
Temozolomide	0.322431	0.760172	-2.54394	0.0516453	0.476357	0.653909	-0.804142	0.457827	DNA akylating agent	DNA replication
Olaparib(1495) + Temozolomide(1375)	0.482815	0.676908	0.814364	0.50098	0.509375	0.661129	-7.84628	0.0158579	PARP1	Genome integrity (PARP)
Vorinostat	-2.9066	0.0122516	1.5735	0.139616	0.40853	0.689534	0.875993	0.396932	HDAC inhibitor Class I, IIa, IIb, IV	chromain histone acetylation
NVP-AUY922	24.3185	0.0261636	-1.60316	0.355051	-0.501088	0.704279	-4.85145	0.12941	HSP90	Unknown
AZD8055	1.282	0.222235	0.257082	0.80114	0.385972	0.70576	-1.7077	0.111446	mTORC1/2	TOR signaling
MK-2206	0.72486	0.481382	0.209844	0.837042	-0.385735	0.705932	-0.470797	0.645587	AKT1, AKT2	PI3K signaling
BI-2536	-1.70418	0.119167	0.168807	0.869314	0.375221	0.715332	1.07286	0.30854	PLK1/2/3	mitosis
GSK1120212	0.0318365	0.975229	0.344103	0.737895	0.365641	0.722249	-0.444852	0.6659	MEK1, MEK2	Unknown
Cyclophosphamide	0.903214	0.407818	-3.35088	0.0203093	0.346696	0.742934	-0.446648	0.67381	DNA akylating agent	Unknown
NU-7441	-0.50223	0.623904	0.811722	0.431563	0.310581	0.761043	-0.842016	0.415001	DNAPK	Genome integrity
BX-795	-2.64014	0.0203905	2.888	0.0126969	0.284596	0.780437	3.22861	0.00659418	TBK1, PDPK1, IKK, AURKB, AURKC	other
BMN-673	-1.68155	0.12357	1.14535	0.278734	-0.262993	0.797895	2.9745	0.0139382	PARP1	Genome integrity (PARP)
Gemcitibine	-2.53439	0.0296468	1.10724	0.294113	0.260585	0.7997	2.61094	0.0259989	DNA replication	Unknown
(5Z)-7-Oxozeaenol	-0.457936	0.656788	0.603864	0.559382	-0.25161	0.806438	-0.0714746	0.944429	TAK1 (MAP3K7)	other
AZD2281	-0.303094	0.766614	1.34679	0.201058	0.245354	0.810013	0.827842	0.422698	PARP1, PARP2	Unknown
SB 216763	-0.248438	0.807677	0.658958	0.521424	0.237885	0.815678	0.215692	0.832575	GSK3A, GSK3B	WNT signaling
Gefitinib	0.616176	0.548416	0.162414	0.873477	-0.228098	0.823119	-0.797744	0.439349	EGFR	EGFR signaling
LCL161	-0.299904	0.776318	-0.74553	0.489493	-0.197325	0.851344	1.24275	0.269061	NA	Unknown
AMG-706	0.45386	0.657414	-0.542266	0.596808	-0.183586	0.857171	-0.316404	0.756719	VEGFR, RET, c-KIT, PDGFR	RTK signaling
BMS-536924	-1.79086	0.096617	2.6152	0.02138	-0.173737	0.864748	-0.655729	0.523435	IGF-1R	IGFR signaling
AZD7762	-0.318915	0.756352	-0.165152	0.872116	0.170667	0.867889	1.7357	0.113268	CHEK1, CHEK2	Genome integrity (CHEK)
mirin	-0.443427	0.675987	0.344006	0.744837	0.171997	0.870185	0.741399	0.491783	MRE11-Rad50-Nbs1 complex	Unknown
PLX4720	0.676797	0.510399	-0.529786	0.605191	0.165122	0.871388	-2.23834	0.0433294	BRAF	BRAF
CHIR-99021	-2.55778	0.0238392	1.61326	0.130688	-0.148905	0.883914	0.149417	0.883518	GSK3B	WNT signaling
Paclitaxel	-0.320044	0.755522	-0.512154	0.619664	0.145798	0.886978	-0.600891	0.561285	Beta subunit of tubulin	cytoskeleton
EPZ004777	-2.93053	0.209349	3.61374	0.171866	0.178635	0.887465	11.8103	0.0537754	Dot1L (Histone-lysine N-methyltransferase, H3 lysine-79 specific)	Unknown
GDC-0449	0.172569	0.865866	-0.799581	0.439495	-0.144385	0.887593	-0.170901	0.86715	SMO	Unknown
GDC0941	1.15174	0.268718	0.437225	0.668617	-0.128104	0.899889	-2.16179	0.0484402	PI3K (class 1)	PI3K signaling
GW 441756	-0.190423	0.851919	0.227128	0.823857	-0.12456	0.902777	-0.0951592	0.92564	NTRK1	RTK signaling
GSK2118436	0.764267	0.462361	-0.792424	0.446505	-0.120957	0.906121	-1.69566	0.120807	BRAF	BRAF
AZ628	0.348502	0.733043	-0.915553	0.376572	-0.104953	0.918015	-1.31747	0.21043	BRAF	BRAF
Anastrozole	-0.125537	0.902177	-1.45791	0.170534	0.103139	0.919556	0.623745	0.54447	ER	Unknown
MLN8237	-2.37377	0.253825	4.93055	0.12739	0.107316	0.931941	6.42796	0.0982515	AURKA	Unknown
681640	0.209934	0.836974	0.500562	0.625046	-0.0633321	0.950465	0.0486949	0.961903	WEE1, CHEK1	Genome integrity (CHEK)
AG-014699	0.86718	0.406171	-0.759396	0.46514	0.0549026	0.957298	-1.32968	0.213158	PARP1, PARP2	Genome integrity (PARP)
KU-55933	1.32803	0.207015	-0.902117	0.383405	-0.0509455	0.960143	-1.3492	0.200303	ATM	Genome integrity
Obatoclax Mesylate	-1.51069	0.154788	-0.125468	0.902073	0.0406181	0.968218	0.321334	0.753065	BCL-2, BCL-XL, MCL-1	apoptosis regulation
Vinblastine	-1.37954	0.190996	-0.248729	0.807457	0.0374752	0.970675	0.876792	0.396513	Microtubules	cytoskeleton
BIBW2992	1.00561	0.331668	-0.514156	0.615163	-0.0292735	0.97706	-0.388802	0.703272	EGFR, ERBB2	Unknown
Erlotinib	-2.20177	0.0789181	0.417749	0.693464	0.0202883	0.984598	5.4297	0.00287254	EGFR	EGFR signaling
5-Fluorouracil	-0.892193	0.393252	-0.0632724	0.950796	-0.00216775	0.998313	0.133709	0.896285	antimetabolite	DNA replication

## Sheet: E-TKIs sensitivity
Drug	Targets
Afatinib	EGFR, ERBB2.
Axitinib	EGFR, ERBB2
Brivani	VEGFR, PDGFR
Cabozantinib	VEGFR, MET, RET, KIT, FLT1, FLT3, FLT4, TIE2,AXL
Cediranib	VEGFR, FLT1, FLT2,FLT3, FLT4, KIT, PDGFRB
Cetuximab	VEGFR, FLT1, FLT2,FLT3, FLT4, KIT, PDGFRB
Erlotinib	EGFR
Foretinib	MET, KDR, TIE2, VEGFR3/FLT4,RON, PDGFR,
Gefitinib	EGFR, ERBB2
Lapatinib.	VEGFR1,VEGFR2,VEGFR3,CSF1R, FLT3, KIT
Linifanib	VEGFR1,VEGFR2,VEGFR3,CSF1R, FLT3, KIT
Motesanib.	VEGFR, RET, KIT, PDGFR
Osimertinib	EGFR
Pelitinib	EGFR
Ponatinib	ABL, PDGFRA, VEGFR2, FGFR1, SRC, TIE2
Sapitinib	EGFR,ERBB2, ERBB3
Sorafenib	PDGFR, KIT, VEGFR, RAF
Sunitinib	PDGFR, KIT, VEGFR, FLT3, RET, CSF1R
Tivozanib	EGFR1, VEGFR2,VEGFR3, PDGFR, KIT
Pacritinib	JAK2 and Flt3
Britinib	ALK
Critinib	ALK
Crizotinib	ALK
